# Supplementary material for: Supersensitive and selective detection of picric acid explosive by fluorescent Ag nanoclusters
Source: Royal Society of Chemistry journal article supplement (doi:10.1039/c5an02251g), 2015-11-30
Supplement: c5an02251g1.pdf [file c5an02251g1.pdf]

## **Electronic Supplementary Information**

### **Supersensitive and selective detection of picric acid explosive by fluorescent Ag nanoclusters**

Jian Rong Zhang, Yuan Yuan Yue, Hong Qun Luo,\* and Nian Bing Li\*

Key Laboratory of Eco-environments in Three Gorges Reservoir Region (Ministry of Education),  
School of Chemistry and Chemical Engineering, Southwest University, Chongqing 400715, PR  
China.

\* Corresponding authors: linb@swu.edu.cn (N.B. Li); luohq@swu.edu.cn (H.Q. Luo)

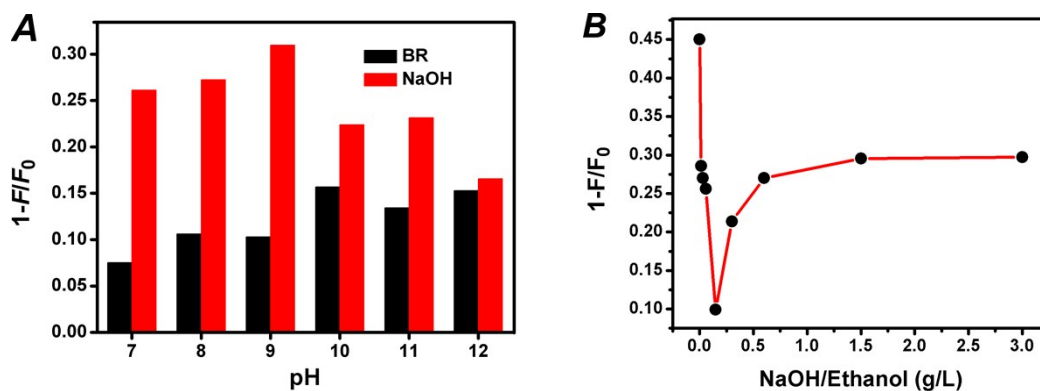

**Fig. S1** Fluorescence quenching efficiencies of Ag nanoclusters in different media in the presence of 2  $\mu$ M PA. Black column in (A) for 10 mM BR buffer solutions at different pHs; red column in (A) for NaOH aqueous solutions at different pHs; (B) for NaOH ethanol solutions with different basicities.  $F_0$  and  $F$  represent the fluorescence intensity ( $\lambda_{\text{ex}} = 375$  nm,  $\lambda_{\text{em}} = 450$  nm) of Ag nanoclusters in the absence and presence of PA, respectively.

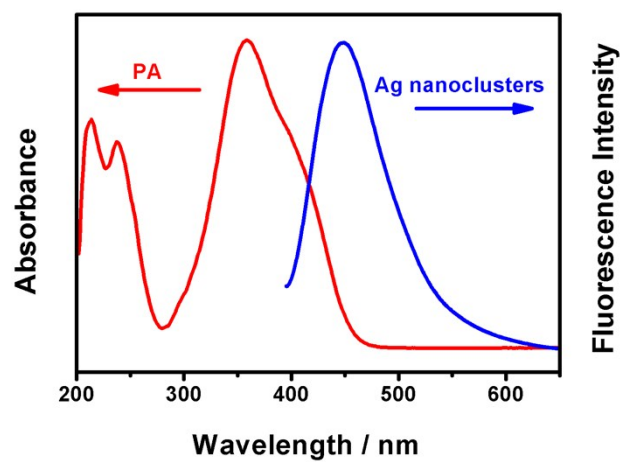

Fig. S2. Absorption spectrum of PA and fluorescence emission spectrum of Ag nanoclusters in ethanol medium.

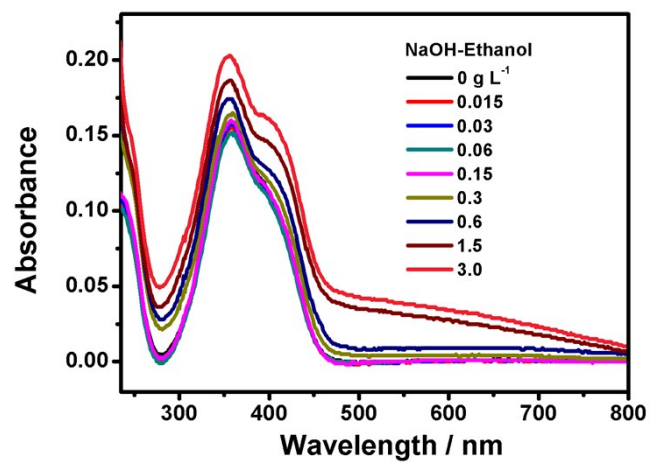

Fig. S3 Absorption spectra of 20  $\mu\text{M}$  PA in the presence of NaOH ethanol solutions with different basicities. The alkalinities ( $\text{g L}^{-1}$ ) of the NaOH ethanol solutions are denoted as grams of NaOH in 1 L ethanol.

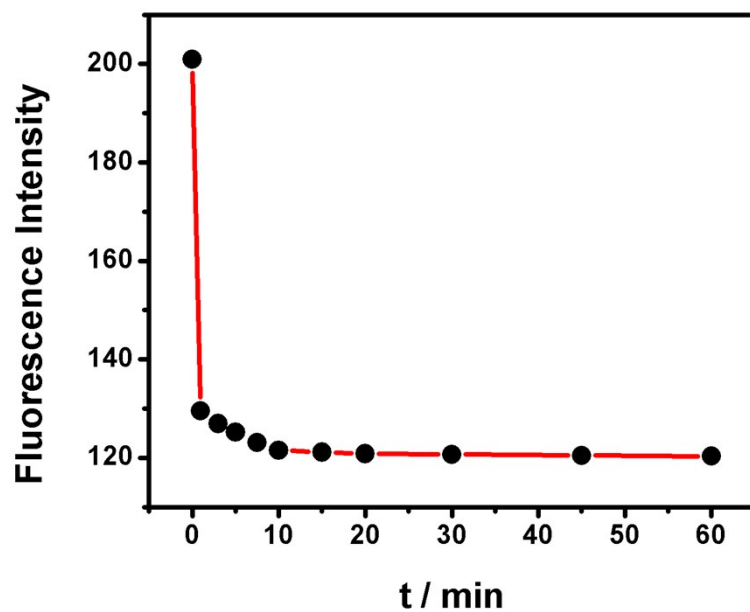

**Fig. S4** The fluorescence intensity of Ag nanoclusters in the presence of 2  $\mu$ M PA after different reaction times in ethanol medium.

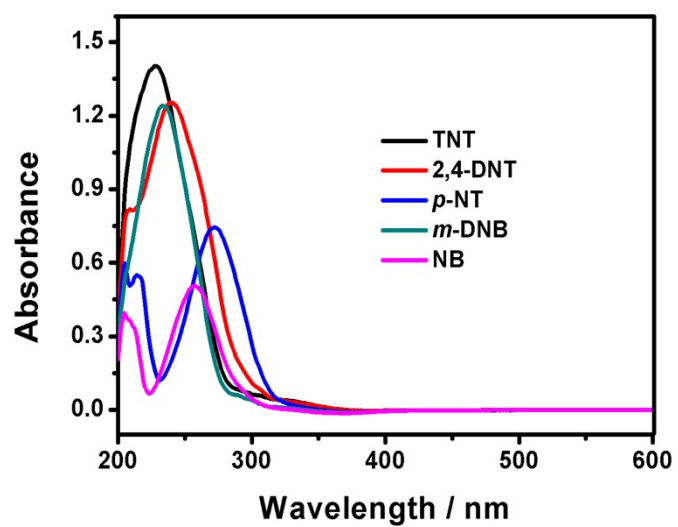

**Fig. S5** Absorption spectra of other nitroaromatics in ethanol medium. The concentration of each nitroaromatic is 100  $\mu$ M.

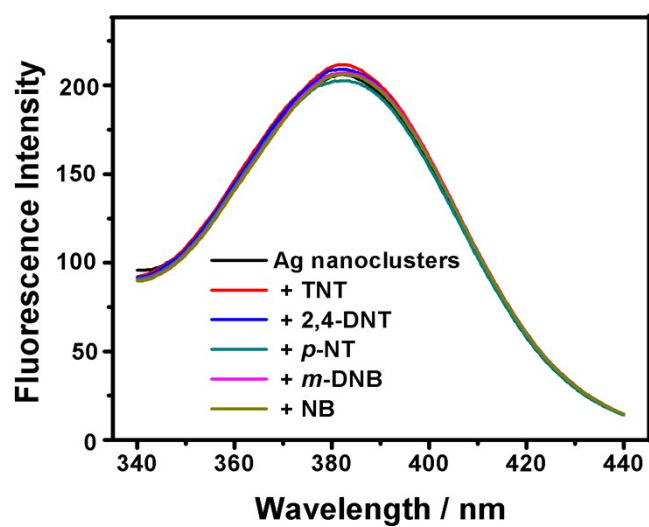

**Fig. S6** Excitation spectra of Ag nanoclusters upon addition of different nitroaromatics in ethanol medium. The concentrations of TNT, 2,4-DNT, *p*-NT, *m*-DNB, and NB are 100  $\mu$ M, respectively.

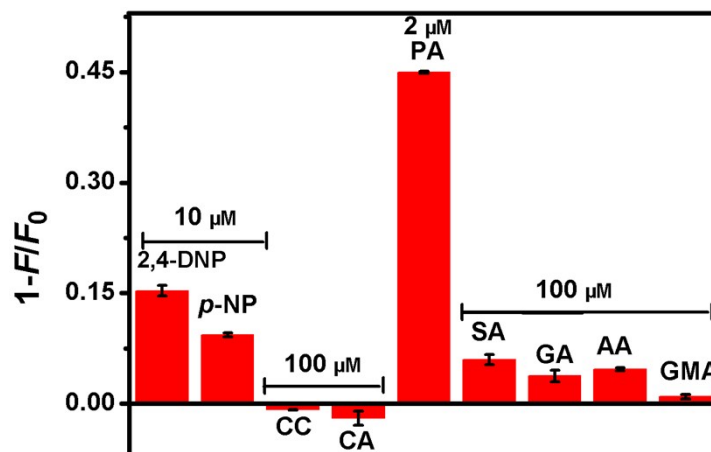

**Fig. S7** The fluorescence quenching efficiencies ( $1-F/F_0$ ) of Ag nanoclusters in the presence of different phenolic compounds and several other acidic and organic analytes in ethanol. The concentration of PA is 2  $\mu\text{M}$ ; the concentrations of 2,4-DNP and *p*-NP are 10  $\mu\text{M}$ , respectively; the concentrations of *o*-dihydroxybenzene (CC), phenol (CA), salicylic acid (SA), glutaric acid (GA), adipic acid (AA), and L-glutamic acid (GMA) are 100  $\mu\text{M}$ , respectively.  $F_0$  and  $F$  denote the fluorescence intensity of Ag nanoclusters in the absence and presence of analyte in ethanol, respectively;  $1 - F/F_0$  is the fluorescence quenching efficiency of Ag nanoclusters by analyte.



**Table S1** The performance comparison of different fluorescent PA sensors.

| Probe <sup>ref.</sup>                                                                        | Medium                                    | Selectivity | Sensitivity (nM)       |
|----------------------------------------------------------------------------------------------|-------------------------------------------|-------------|------------------------|
| a conjugated polymer containing heteroatom polycyclic units <sup>1</sup>                     | CHCl <sub>3</sub>                         | high        | NG                     |
| a conjugated polymer film <sup>2</sup>                                                       | aqueous solution                          | low         | 8.7                    |
| a composite film of hexaphenylsilole and achitosan <sup>3</sup>                              | water                                     | high        | 21                     |
| photoluminescent polysiloles <sup>4</sup>                                                    | toluene                                   | low         | 26                     |
| an luminogen-functionalized mesoporous material <sup>5</sup>                                 | water                                     | NG          | 1.7 × 10 <sup>3</sup>  |
| hexa-peri-hexabenzocoronene <sup>6</sup>                                                     | H <sub>2</sub> O:THF (4:6)                | high        | 4                      |
| a pentacenequinone derivative <sup>7</sup>                                                   | toluene:DCM (8:2)                         | low         | 350                    |
| a mercury-modulated hexaphenylbenzene derivative <sup>8</sup>                                | H <sub>2</sub> O:THF (4:6)                | high        | 30                     |
| a pentacenequinone derivative <sup>9</sup>                                                   | H <sub>2</sub> O:THF (9:1)                | low         | 2.18 × 10 <sup>3</sup> |
| N,N-dimethylaminocinnamaldehyde-Hg <sup>2+</sup> complex <sup>10</sup>                       | THF:H <sub>2</sub> O (9:1)                | high        | 170                    |
| zwitterionic squarainedye <sup>11</sup>                                                      | CH <sub>3</sub> CN:H <sub>2</sub> O (9:1) | high        | 70                     |
| N-acylhydrazone <sup>12</sup>                                                                | DMF                                       | high        | 430                    |
| conjugated asymmetric triazines <sup>13</sup>                                                | THF/water                                 | high        | 65                     |
| a hetero-oligophenylene derivative <sup>24</sup>                                             | H <sub>2</sub> O:EtOH (6:4)               | high        | 26                     |
| electron-rich oligofluoranthene <sup>15</sup>                                                | water                                     | low         | 10 <sup>-3</sup>       |
| tris-imidazolium <sup>16</sup>                                                               | CHCl <sub>3</sub>                         | low         | NG                     |
| p-phenylenevinylene-based molecules <sup>17</sup>                                            | THF/water                                 | high        | 15.2                   |
| (benz)imidazolium based tricationic chemosensors <sup>18</sup>                               | HEPES buffer : DMSO (98:2)                | high        | 1                      |
| pentacenequinone derivatives <sup>19</sup>                                                   | H <sub>2</sub> O:THF (9:1)                | low         | 250                    |
| a bispyrene-based molecular <sup>20</sup>                                                    | Milli-Q water                             | low         | 1.0 × 10 <sup>3</sup>  |
| boron-dipyrromethene based fluorescence sensor <sup>21</sup>                                 | CH <sub>3</sub> CN:H <sub>2</sub> O (9:1) | high        | 700                    |
| composite films containing oligotriphenylene and oligotriphenylene/polysulfone <sup>22</sup> | Water                                     | low         | 10                     |
| copolymer microspheres of hexachlorocyclotriphosphazene and curcumin <sup>23</sup>           | CH <sub>3</sub> OH                        | low         | 370                    |
| a metal organic frame <sup>24</sup>                                                          | CH <sub>3</sub> CN                        | high        | NG                     |
| tritycene based metal-organic gels <sup>25</sup>                                             | ethanol                                   | low         | 44                     |
| Pt <sup>II</sup> <sub>6</sub> nanoscopiccages with an organometallic backbone <sup>26</sup>  | acetonitrile/chloroform                   | high        | 3.4 × 10 <sup>3</sup>  |
| 8-hydroxyquinoline aluminum-based composite nanospheres <sup>27</sup>                        | phosphate buffer                          | high        | 140                    |
| polymer functionalized CdTe/ ZnS quantum dots <sup>28</sup>                                  | aqueous solution                          | high        | 9                      |
| graphitic carbon nitride (g-C <sub>3</sub> N <sub>4</sub> ) nanosheets <sup>29</sup>         | aqueous solution                          | high        | 8.2                    |
| MoS <sub>2</sub> quantum dots <sup>30</sup>                                                  | water                                     | high        | 95                     |
| Ag nanoclusters/DNA hybrids <sup>31</sup>                                                    | phosphate buffer                          | low         | 5.2 × 10 <sup>-3</sup> |
| polyethyleneimine-capped Ag nanoclusters <sup>This Work</sup>                                | ethanol                                   | high        | 0.1                    |

NG: Not given

## References

- 1 Y. Y. Long, H. B. Chen, H. M. Wang, Z. Peng, Y. F. Yang, G. Q. Zhang, N. Li, F. Liu and J. Pei, *Anal. Chim. Acta* 2012, **744**, 82–91.
- 2 B. W. Xu, X. F. Wu, H. B. Li, H. Tong and L. X. Wang, *Macromolecules* 2011, **44**, 5089–5092.
- 3 G. He, H. N. Peng, T. H. Liu, M. N. Yang, Y. Zhang and Y. Fang, *J. Mater. Chem.* 2009, **19**, 7347–7353.
- 4 S. Honglae, M. C. Rebecca, J. S.; Michael and C. T. William, *Angew. Chem. Int. Ed.* 2001, **40**, 2104–2105.
- 5 D. D. Li, J. Z. Liu, R. T. K. Kwok, Z. Q. Liang, B. Z. Tang and J. H. Yu, *Chem. Commun.* 2012, **48**, 7167–7169.
- 6 V. Vij, V. Bhalla and M. Kumar, *ACS Appl. Mater. Interfaces* 2013, **5**, 5373–5380.
- 7 V. Bhalla, A. Gupta, M. Kumar, D. S. Shankar Rao and S. K. Prasad, *ACS Appl. Mater. Interfaces* 2013, **5**, 672–679.
- 8 V. Bhalla, S. Kaur, V. Vij and M. Kumar, *Inorg. Chem.* 2013, **52**, 4860–4865.
- 9 V. Bhalla, A. Gupta and M. Kumar, *Org. Lett.* 2012, **14**, 3112–3115.
- 10 M. Kumar, S. I. Reja and V. Bhalla, *Org. Lett.* 2012, **14**, 6084–6087.
- 11 Y. Q. Xu, B. H. Li, W. W. Li, J. Zhao, S. G. Sun and Y. Pang, *Chem. Commun.* 2013, **49**, 4764–4766.
- 12 Y. Peng, A. J. Zhang, M. Dong and Y. W. Wang, *Chem. Commun.* **2011**, *47*, 4505–4507.

- 13 Z. F. An, C. Zheng, R. F. Chen, J. Yin, J. J. Xiao, H. F. Shi, Y. Tao, Y. Qian and W. Huan, *Chem. Eur. J.* 2012, **18**, 15655–15661.
- 14 S. Kaur, V. Bhalla, V. Vij and M. Kumar, *J. Mater. Chem. C* 2014, **2**, 3936–3941.
- 15 X. G. Li, Y. Z. Liao, M. R. Huang, V. Strong and R. B. Kaner, *Chem. Sci.* 2013, **4**, 1970–1978.
- 16 B. Roy, A. K. Bar, B. Gole and P. S. Mukherjee, *J. Org. Chem.* 2013, **78**, 1306–1310.
- 17 N. Dey, S. K. Samanta and S. Bhattacharya, *ACS Appl. Mater. Interfaces* 2013, **5**, 8394–8400.
- 18 R. Kumar, S. Sandhu, P. Singh, G. Hundal, M. S. Hundal and S. Kumar, *Asian J. Org. Chem.* 2014, **3**, 805–813.
- 19 S. Kaur, A. Gupta, V. Bhalla and M. Kumar, *J. Mater. Chem. C* 2014, **2**, 7356–7363.
- 20 L. P. Ding, Y. M. Bai, Y. Cao, G. J. Ren, G. J. Blanchard and Y. Fang, *Langmuir* 2014, **30**, 7645–7653.
- 21 S. Madhu, A. Bandela and M. Ravikanth, *RSC Adv.* 2014, **4**, 7120–7123.
- 22 Y. Z. Liao, V. Strong, Y. Wang, X. G. Li, X. Wang and R. B. Kaner, *Adv. Funct. Mater.* 2012, **22**, 726–735.
- 23 W. Wei, R. Lu, S. Tang and X. Liu, *J. Mater. Chem. A*, 2015, **3**, 4604–4611.
- 24 S. S. Nagarkar, Bi. Joarder, A. K. Chaudhari, S. Mukherjee and S. K. Ghosh, *Angew. Chem.* 2013, **125**, 2953–2957.
- 25 S. Barman, J. A. Garg, O. Blacque, K. Venkatesan and H. Berke, *Chem. Commun.*

- 2012, **48**, 11127–11129.
- 26 D. Samanta and P. S. Mukherjee, *Dalton Trans.* 2013, **42**, 16784–16795.
- 27 Y. X. Ma, H. Li, S. Peng and L. Y. Wang, *Anal. Chem.* 2012, **84**, 8415–8421.
- 28 B. X. Liu, C. Y. Tong, L. J. Feng, C. Y. Wang, Y. He and C. L. Lü, *Chem. Eur. J.* 2014, **20**, 2132–2137.
- 29 M. Rong, L. Lin, X. Song, T. Zhao, Y. Zhong, J. Yan, Y. Wang, X. Chen, *Anal. Chem.* 2015, **87**, 1288–1296.
- 30 Y. Wang and Y. N. Ni, *Anal. Chem.* 2014, **86**, 7463–7470.
- 31 N. Enkin, E. Sharon, E. Golub and I. Willner, *Nano Lett.* 2014, **14**, 4918–4922.
